# Supplementary material for: Partial double bond character in chalcogen compounds of stanna-closo-dodecaborate
Source: Royal Society of Chemistry journal article supplement (doi:10.1039/b814936d), 2008-12-19
Supplement: b814936d.pdf [file b814936d.pdf]

## Supporting Information

### Partial Double Bond Character in Chalcogen Compounds of Stanna-*closo*-dodecaborate

Marius Kirchmann,<sup>[a]</sup> Torben Gädt,<sup>[a]‡</sup> Falko M. Schappacher,<sup>[b]</sup> Rainer Pöttgen,<sup>[b]</sup>  
Florian Weigend<sup>\*[c]</sup> and Lars Wesemann<sup>\*[a]</sup>

Additional figures of the solid state of the heterocubane  $[K]_8[(OSnB_{11}H_{11})_4] \cdot (9H_2O)$  (**2**).

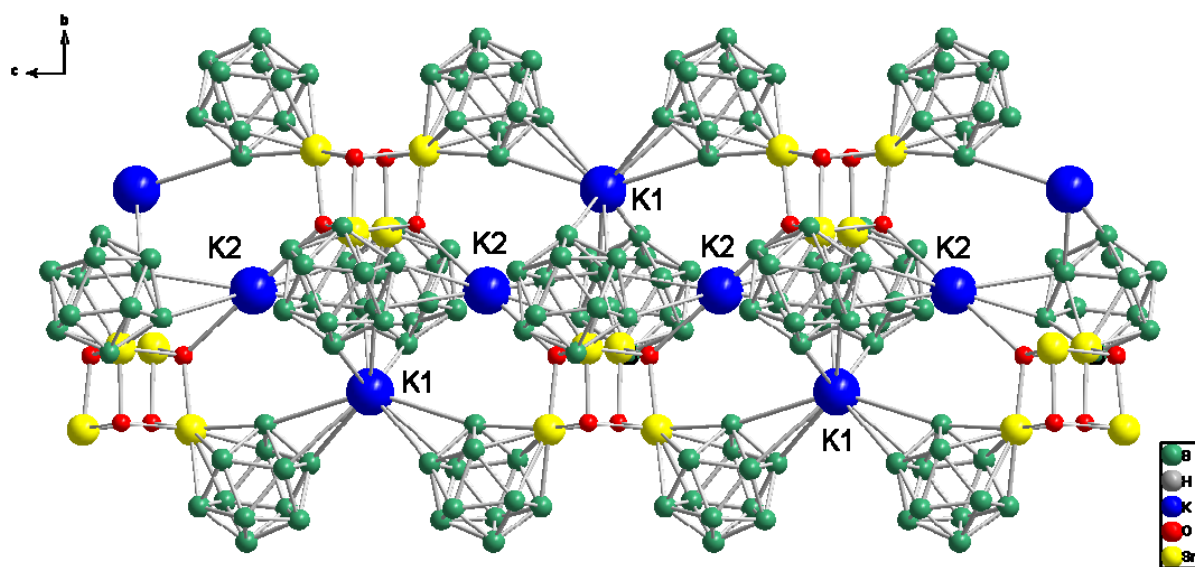

Figure 1. Chain structure. View along the axis *a*, hydrogen atoms have been omitted. Only the Potassium cations K1 and K2 are shown. K1 and K2 are coordinated at BH-units and K2 exhibits also coordination at one oxygen vertex of the heterocubane.

[a] M. Kirchmann, Dr. T. Gädt, Prof. Dr. L. Wesemann  
Institut für Anorganische Chemie  
Universität Tübingen  
Auf der Morgenstelle 18, 72076 Tübingen (Germany)  
E-mail: lars.wesemann@uni-tuebingen.de

[b] F. M. Schappacher, Prof. Dr. R. Pöttgen  
Institut für Anorganische und Analytische Chemie  
Universität Münster  
Corrensstrasse 30, 48149 Münster (Germany)

[c] Dr. F. Weigend  
Institut für Nanotechnologie  
Forschungszentrum Karlsruhe,  
Postfach 3640, 76021 Karlsruhe (Germany)

‡ current address: School of Chemistry,  
University of Bristol, Bristol BS8 1TS, UK

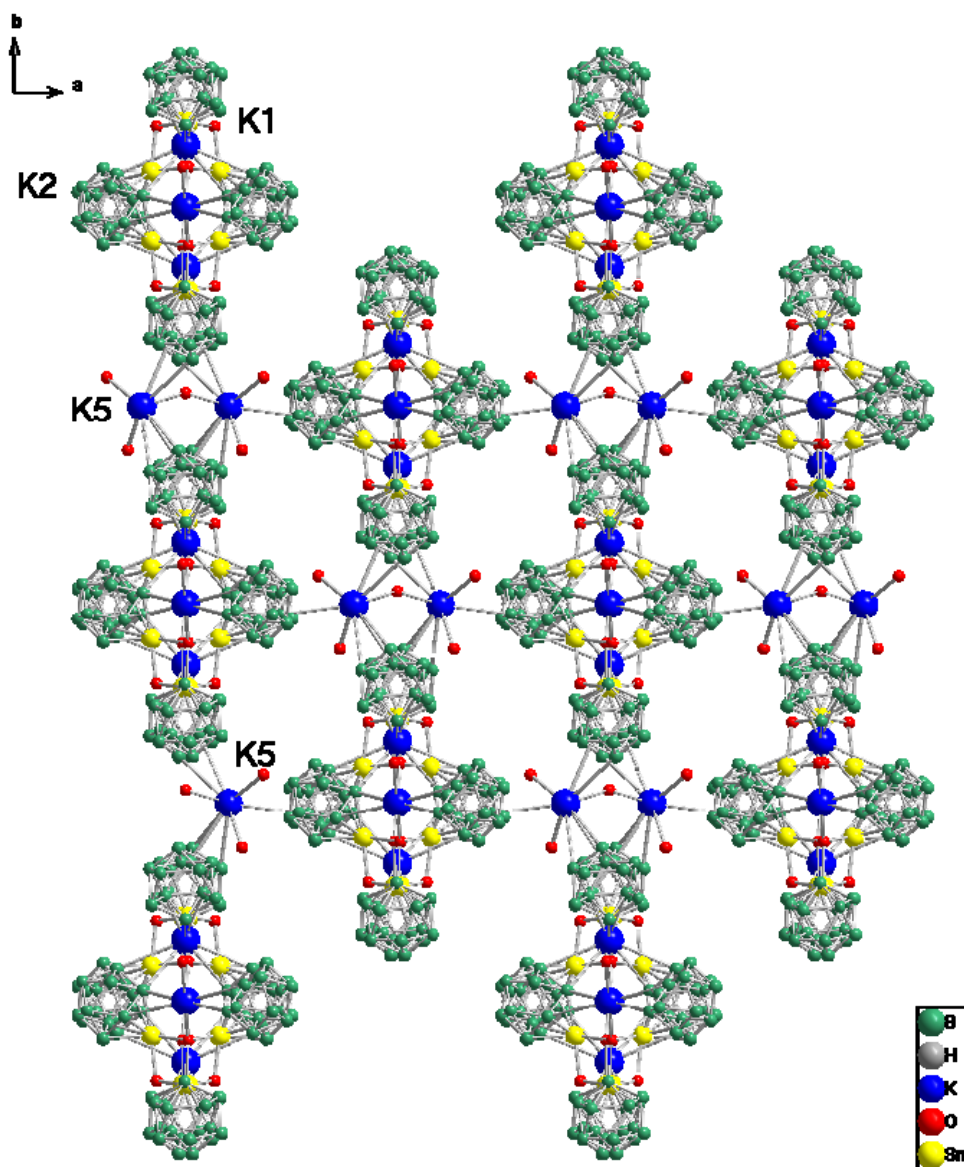

Figure 2. View along axis  $c$ . Coordination of K5 at three borane clusters resulting in a linkage between the chains. K5 shows also coordination to three water molecules. Hydrogen atoms have been omitted.
